# Supplementary material
Source: ML conference proceedings conference paper supplement (https://openaccess.thecvf.com/content/WACV2025/html/Ahmad_PULSE_Physiological_Understanding_WACV_2025_paper.html)
Supplement: Supplementary file 1 [file Ahmad_PULSE_Physiological_Understanding_WACV_2025_supplemental.pdf]

# Supplementary Material: PULSE: Physiological Understanding with Liquid Signal Extraction

Shahzad Ahmad<sup>1</sup>

Sania Bano<sup>2</sup>

Sachin Verma<sup>3</sup>

Yogesh Singh Rawat<sup>4</sup>

shahzaa@hiof.no

sania.22eez0012@iitrpr.ac.in

sachin.verma@ntnu.no

yogesh@crcv.ucf.edu

Sukalpa Chanda<sup>1</sup>

Santosh Kumar Vipparthi<sup>2</sup>

Subrahmanyam Murala<sup>3</sup>

sukalpa@ieee.org

skvipparthi@iitrpr.ac.in

muralas@tcd.ie

<sup>1</sup>Østfold University College, Norway

<sup>2</sup>Indian Institute of Technology Ropar, India

<sup>5</sup>Trinity College Dublin, Ireland

<sup>3</sup>Norwegian University of Science and Technology, Norway

<sup>4</sup>University of Central Florida, USA

## 1. Supplementary Material

We present supplementary material that enhances the understanding of our main paper through additional details and in-depth qualitative analysis. This supplementary content is structured as follows:

- Numerical Solution Using Euler's Method
- Exact Solutions of the ODE
- Gradient Derivations
- Error metric calculation

### 1.1. Numerical Solution Using Euler's Method:

Euler's method is a straightforward numerical technique for solving ordinary differential equations (ODEs) with a given initial value. It approximates the solution by iteratively advancing the solution over small time steps.

**Problem Statement:** Given the ODE:

$$\tau \frac{dh}{dt} = -h + f(x, h) + b \quad (1)$$

we want to find the numerical solution for  $h(t)$  over time using Euler's method.

**Steps for Solving the ODE:**

1. **Rewrite the ODE:**

$$\frac{dh}{dt} = \frac{-h + f(x, h) + b}{\tau} \quad (2)$$

2. **Discretize the Time Variable:** Let's discretize the time domain into small time steps of size  $\Delta t$ :

$$t_n = n\Delta t \quad (3)$$

where  $n$  is an integer index representing the time step.

3. **Approximate the Derivative:** The time derivative  $\frac{dh}{dt}$  at time  $t_n$  can be approximated using the forward difference:

$$\left. \frac{dh}{dt} \right|_{t=t_n} \approx \frac{h_{n+1} - h_n}{\Delta t} \quad (4)$$

4. **Substitute the Approximation into the ODE:** Substituting the forward difference approximation into the ODE, we get:

$$\frac{h_{n+1} - h_n}{\Delta t} = \frac{-h_n + f(x_n, h_n) + b}{\tau} \quad (5)$$

5. **Solve for  $h_{n+1}$ :** Rearrange the equation to solve for  $h_{n+1}$ :

$$h_{n+1} = h_n + \Delta t \cdot \frac{-h_n + f(x_n, h_n) + b}{\tau} \quad (6)$$

6. **Iterative Update Rule:** This gives us the iterative update rule for  $h$ :

$$h_{n+1} = h_n + \frac{\Delta t}{\tau} (-h_n + f(x_n, h_n) + b) \quad (7)$$

### 1.2. Exact Solutions of the ODE

**Exact Solution Using Differential Calculus:** For a simplified case, where  $f(x, h)$  is a linear function of  $x$  and  $h$ , the ODE can be solved exactly. Consider:

$$\tau \frac{dh}{dt} = -h + W_{ih}x + W_{hh}h + b \quad (8)$$

Rewriting, we get:

$$\frac{dh}{dt} = -\frac{h}{\tau} + \frac{W_{ih}x + W_{hh}h + b}{\tau} \quad (9)$$

This can be solved using the integrating factor method. Multiply both sides by  $e^{t/\tau}$ :

$$e^{t/\tau} \frac{dh}{dt} + \frac{he^{t/\tau}}{\tau} = \frac{(W_{ih}x + W_{hh}h + b)e^{t/\tau}}{\tau} \quad (10)$$

The left side is the derivative of  $he^{t/\tau}$ :

$$\frac{d}{dt} \left( he^{t/\tau} \right) = \frac{(W_{ih}x + W_{hh}h + b)e^{t/\tau}}{\tau} \quad (11)$$

Integrating both sides:

$$he^{t/\tau} = \int \frac{(W_{ih}x + W_{hh}h + b)e^{t/\tau}}{\tau} dt \quad (12)$$

Solving for  $h$ :

$$h(t) = \left( \int \frac{(W_{ih}x + W_{hh}h + b)e^{t/\tau}}{\tau} dt \right) e^{-t/\tau} \quad (13)$$

### 1.3. Gradient Derivations

The iterative update of the hidden state  $h_j$  is defined as:

$$h_{t+\Delta t}^{(l)} = h_t^{(l)} + \frac{\Delta t}{\tau} \left( -h_t^{(l)} + \tanh \left( \text{conv3d}(X, W_{ih}) + \text{conv3d}(h_t^{(l)}, W_{hh}) + b \right) \right) \quad (14)$$

#### 1.3.1 Gradient of Loss with respect to $W_{ih}$

The gradient of the loss  $\mathcal{L}$  with respect to  $W_{ih}$  can be computed as follows:

$$\frac{\partial \mathcal{L}}{\partial W_{ih}} = \sum_{l=0}^{L-1} \frac{\partial \mathcal{L}}{\partial h_t^{(l+1)}} \cdot \frac{\partial h_t^{(l+1)}}{\partial W_{ih}} \quad (15)$$

The term  $\frac{\partial h_{j+1}}{\partial W_{ih}}$  can be expanded using the chain rule:

$$\begin{aligned} \frac{\partial h_t^{(l+1)}}{\partial W_{ih}} &= \frac{\Delta t}{\tau} \cdot \text{diag} \left( 1 - \tanh^2 \right. \\ &\quad \left. \left( \text{conv3d}(X, W_{ih}) + \text{conv3d}(h_t^{(l)}, W_{hh}) + b \right) \right) \\ &\quad \cdot \frac{\partial}{\partial W_{ih}} \text{conv3d}(X, W_{ih}) \end{aligned} \quad (16)$$

Thus,

$$\begin{aligned} \frac{\partial \mathcal{L}}{\partial W_{ih}} &= \sum_{j=0}^{L-1} \frac{\partial \mathcal{L}}{\partial h_t^{(l+1)}} \cdot \frac{\Delta t}{\tau} \\ &\quad \cdot \text{diag} \left( 1 - \tanh^2 \left( \text{conv3d}(X, W_{ih}) \right. \right. \\ &\quad \left. \left. + \text{conv3d}(h_t^{(l)}, W_{hh}) + b \right) \right) \\ &\quad \cdot \frac{\partial}{\partial W_{ih}} \text{conv3d}(X, W_{ih}) \end{aligned} \quad (17)$$

#### 1.3.2 Gradient of Loss with respect to $W_{hh}$

Similarly, for the recurrent weights  $W_{hh}$ :

$$\frac{\partial \mathcal{L}}{\partial W_{hh}} = \sum_{l=0}^{L-1} \frac{\partial \mathcal{L}}{\partial h_t^{(l+1)}} \cdot \frac{\partial h_t^{(l+1)}}{\partial W_{hh}} \quad (18)$$

Where:

$$\begin{aligned} \frac{\partial h_t^{(l+1)}}{\partial W_{hh}} &= \frac{\Delta t}{\tau} \cdot \text{diag} \left( 1 - \tanh^2 \left( \text{conv3d}(X, W_{ih}) \right. \right. \\ &\quad \left. \left. + \text{conv3d}(h_t^{(l)}, W_{hh}) + b \right) \right) \\ &\quad \cdot \frac{\partial}{\partial W_{hh}} \text{conv3d}(h_t^{(l)}, W_{hh}) \end{aligned} \quad (19)$$

#### 1.3.3 Gradient of Loss with respect to $\tau$

For  $\tau$ :

$$\frac{\partial \mathcal{L}}{\partial \tau} = \sum_{l=0}^{L-1} \frac{\partial \mathcal{L}}{\partial h_t^{(l+1)}} \cdot \frac{\partial h_t^{(l+1)}}{\partial \tau} \quad (20)$$

Where:

$$\begin{aligned} \frac{\partial h_t^{(l+1)}}{\partial \tau} &= -\frac{\Delta t}{\tau^2} \left( h_t^{(l)} - \tanh \left( \text{conv3d}(X, W_{ih}) \right. \right. \\ &\quad \left. \left. + \text{conv3d}(h_t^{(l)}, W_{hh}) + b \right) \right) \end{aligned} \quad (21)$$

#### 1.3.4 Gradient of Loss with respect to $b$

Finally, for the bias term  $b$ :

$$\frac{\partial \mathcal{L}}{\partial b} = \sum_{l=0}^{L-1} \frac{\partial \mathcal{L}}{\partial h_t^{(l+1)}} \cdot \frac{\partial h_t^{(l+1)}}{\partial b} \quad (22)$$

Where:

$$\frac{\partial h_t^{(l+1)}}{\partial b} = \frac{\Delta t}{\tau} \cdot \text{diag} \left( 1 - \tanh^2 (\text{conv3d}(X, W_{ih}) + \text{conv3d}(h_t^{(l)}, W_{hh}) + b) \right) \quad (23)$$

#### 1.4. Error metric calculation

We follow the metrics to calculate the measurement accuracy.

Here  $\hat{y}$  = heart rate,  $y$  = ground truth, error  $e = \hat{y} - y$

##### 1.4.1 Pearson Correlation Coefficient (r)

The value of the Pearson correlation coefficient is between -1 to +1.

$$L_{rppg} = \frac{\frac{1}{N} \sum_{i=1}^N \hat{y}_i y_i - \frac{1}{N} \sum_{i=1}^N \hat{y}_i \frac{1}{N} \sum_{i=1}^N y_i}{\sqrt{\frac{1}{N} \sum_{i=1}^N \hat{y}_i^2 - \left(\frac{1}{N} \sum_{i=1}^N \hat{y}_i\right)^2} \sqrt{\frac{1}{N} \sum_{i=1}^N y_i^2 - \left(\frac{1}{N} \sum_{i=1}^N y_i\right)^2}} \quad (24)$$

##### 1.4.2 Mean Absolute Error (MAE)

$$MAE = \sum_{i=1}^N \frac{|e_i|}{N} \quad (25)$$

##### 1.4.3 Root Mean Squared Error (RMSE)

$$RMSE = \sqrt{\sum_{i=1}^N \frac{e_i^2}{N}} \quad (26)$$

##### 1.4.4 Standard deviation (STD)

$$STD = \sqrt{\frac{1}{N} \sum_{i=1}^N e_i^2 - \left(\frac{1}{N} \sum_{i=1}^N e_i\right)^2} \quad (27)$$
